# Supplementary material
Source: PubMed Central journal article supplement (PMC3663279)
Supplement: supp_tpc.113.109827_tpc190827Supplemental.pdf [file supp_tpc.113.109827_tpc190827Supplemental.pdf]

**Supplemental Fig. 1.** Responses to high light stress of the *ch1* single mutant and the *ch1 ex1* double mutant.

A) Autoluminescence imaging of lipid peroxides, B) HOTE levels (in  $\text{nmol g}^{-1}$  fresh weight,  $n=4$ ) and C) PSII photochemical efficiency ( $F_v/F_m$ ).  $n=10$ . C= control; S= stress ( $1000 \mu\text{mol m}^{-2} \text{s}^{-1}$  for 2 d). Data are mean values + SD.

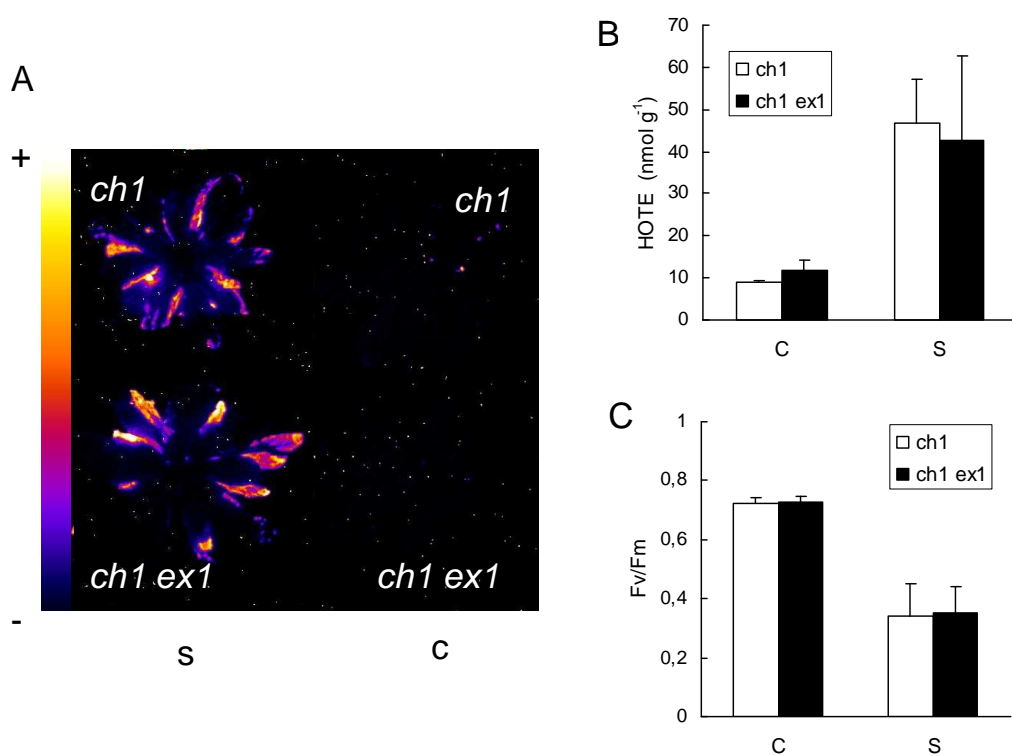

**Supplemental Figure 2.** Levels of different volatile derivatives of  $\beta$ -carotene ( $\beta$ -cyclocitral,  $\beta$ -ionone, dihydroactinidiolide) in *ch1* mutant leaves exposed to acclimatory conditions (A =  $450 \mu\text{mol photons m}^{-2} \text{s}^{-1}$ , 2d). C = control conditions. Data are normalized to the control value (before acclimation) + SD.

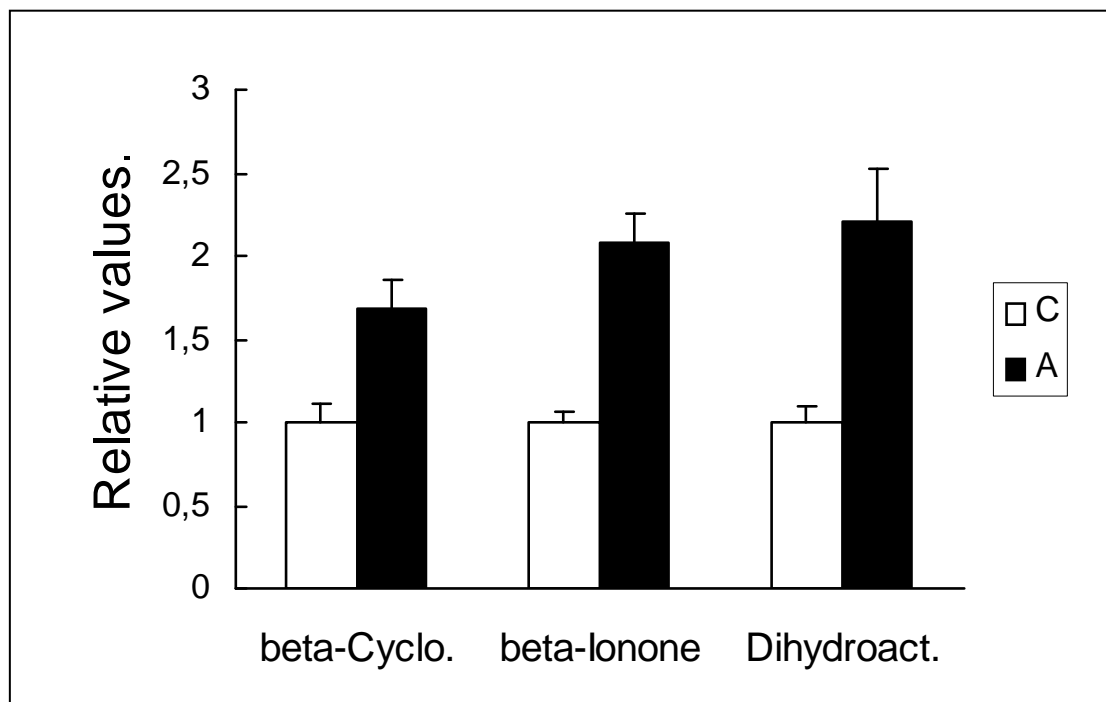

**Supplemental Table 1.** List of  $^1\text{O}_2$  specific genes induced in *ch1* mutant leaves during high light stress ( $S=1000 \mu\text{mol photons m}^{-2} \text{s}^{-1}$  for 2 d). For comparison purposes, the gene responses in WT leaves is also shown.

| Locus identifier | Description                                                                                                      | Fold change |                |            |
|------------------|------------------------------------------------------------------------------------------------------------------|-------------|----------------|------------|
|                  |                                                                                                                  | WT S/C      | <i>ch1</i> S/C | <i>flu</i> |
| AT1G01260        | basic helix-loop-helix (bHLH) family protein                                                                     | nde         | 1.591          | 5.336      |
| AT1G02660        | lipase class 3 family protein                                                                                    | nde         | 2.926          | 6.059      |
| AT1G03740        | kinase                                                                                                           | nde         | 1.881          | 8.504      |
| AT1G05010        | EFE (ethylene forming enzyme)                                                                                    | nde         | 2.782          | 5.248      |
| AT1G07500        | unknown protein                                                                                                  | nde         | 2.047          | 13.896     |
| AT1G08930        | ERD6 (EARLY RESPONSE TO DEHYDRATION 6); carbohydrate transporter/ sugar porter                                   | nde         | 2.127          | 5.080      |
| AT1G09940        | HEMA2; glutamyl-tRNA reductase                                                                                   | nde         | 3.035          | 16.851     |
| AT1G11960        | early-responsive to dehydration protein-related / ERD protein-related                                            | nde         | 1.472          | 5.366      |
| AT1G19310        | zinc finger (C3HC4-type RING finger) family protein                                                              | nde         | 2.256          | 10.973     |
| AT1G19770        | ATPUP14 (Arabidopsis thaliana purine permease 14); purine transporter                                            | 0.65        | 1.952          | 7.286      |
| AT1G21000        | unknown protein                                                                                                  | nde         | 1.480          | 5.807      |
| AT1G22280        | protein phosphatase 2C, putative / PP2C. putative                                                                | nde         | 2.406          | 5.064      |
| AT1G25500        | choline transporter-related                                                                                      | nde         | 1.661          | 11.345     |
| AT1G27130        | ATGSTU13 (GLUTATHIONE S-TRANSFERASE 12); glutathione transferase                                                 | nde         | 5.668          | 5.485      |
| AT1G28380        | NSL1 (NECROTIC SPOTTED LESIONS 1)                                                                                | nde         | 2.883          | 5.377      |
| AT1G33590        | disease resistance protein-related / LRR protein-related                                                         | 1.70        | 3.970          | 6.818      |
| AT1G50640        | ATERF3/ERF3 (ETHYLENE RESPONSIVE ELEMENT BINDING FACTOR 3); DNA binding / protein binding / transcription factor | 0.73        | 1.501          | 5.649      |
| AT1G51620        | protein kinase family protein                                                                                    | nde         | 1.914          | 26.597     |
| AT1G63830        | proline-rich family protein                                                                                      | nde         | 1.677          | 6.839      |
| AT1G69270        | RPK1 (RECEPTOR-LIKE PROTEIN KINASE 1); kinase                                                                    | nde         | 1.483          | 5.888      |
| AT1G69500        | oxygen binding                                                                                                   | 0.59        | 1.633          | 9.382      |
| AT1G73080        | PEPR1 (PEP1 RECEPTOR 1); ATP binding / kinase/ protein binding / protein serine/threonine kinase                 | nde         | 2.981          | 18.878     |
| AT1G74440        | unknown protein. MYB95 (myb domain protein 95); DNA binding / transcription factor                               | nde         | 1.746          | 12.664     |
| AT1G74450        | unknown protein                                                                                                  | nde         | 2.408          | 8.089      |
| AT1G74930        | AP2 domain-containing transcription factor, putative                                                             | nde         | 1.633          | 11.963     |
| AT1G75450        | CKX5 (CYTOKININ OXIDASE 5); cytokinin dehydrogenase                                                              | nde         | 1.562          | 5.120      |
| AT1G78080        | RAP2.4 (related to AP2 4); DNA binding / transcription factor                                                    | nde         | 1.933          | 5.459      |
| AT2G04305        | magnesium transporter CorA-like protein-related                                                                  | nde         | 1.612          | 5.900      |
| AT2G15960        | unknown protein                                                                                                  | nde         | 3.265          | 5.490      |
| AT2G20340        | tyrosine decarboxylase, putative                                                                                 | nde         | 1.505          | 7.694      |
| AT2G22300        | ethylene-responsive calmodulin-binding protein. putative (SR1)                                                   | nde         | 1.700          | 6.762      |
| AT2G23450        | protein kinase family protein                                                                                    | nde         | 1.789          | 7.012      |
| AT2G25625        | unknown protein                                                                                                  | 1.84        | 1.532          | 5.366      |
| AT2G27830        | unknown protein                                                                                                  | nde         | 1.739          | 6.620      |
| AT2G29450        | ATGSTU5 (Arabidopsis thaliana Glutathione S-transferase (class tau) 5); glutathione transferase                  | nde         | 2.267          | 7.468      |
| AT2G30360        | CIPK11 (SNF1-RELATED PROTEIN KINASE 3.22. SOS3-INTERACTING PROTEIN 4); kinase                                    | nde         | 3.682          | 13.523     |
| AT2G32240        | unknown protein                                                                                                  | nde         | 3.572          | 5.508      |
| AT2G38400        | AGT3 (ALANINE:GLYOXYLATE AMINOTRANSFERASE 3); alanine-glyoxylate transaminase                                    | nde         | 1.563          | 8.996      |
| AT2G39200        | MLO12 (MILDEW RESISTANCE LOCUS O 12); calmodulin binding                                                         | nde         | 1.901          | 14.451     |
| AT2G39420        | esterase/lipase/thioesterase family protein                                                                      | nde         | 1.976          | 12.631     |
| AT2G43020        | ATPAO2 (POLYAMINE OXIDASE 2); amine oxidase. unknown protein                                                     | 0.65        | 1.697          | 5.419      |

|           |                                                                                                                    |      |       |         |
|-----------|--------------------------------------------------------------------------------------------------------------------|------|-------|---------|
| AT2G44840 | ATERF13/EREBP (ETHYLENE-RESPONSIVE ELEMENT BINDING FACTOR 13); DNA binding / transcription factor                  | nde  | 3.593 | 42.082  |
| AT2G46620 | AAA-type ATPase family protein                                                                                     | nde  | 2.107 | 5.520   |
| AT2G47060 | kinase                                                                                                             | nde  | 1.728 | 6.978   |
| AT3G02140 | TMAC2 (TWO OR MORE ABRES-CONTAINING GENE 2)                                                                        | nde  | 1.893 | 11.884  |
| AT3G02875 | ILR1 (IAA-LEUCINE RESISTANT 1); metallopeptidase                                                                   | nde  | 1.645 | 6.943   |
| AT3G03480 | CHAT (ACETYL COA:(Z)-3-HEXEN-1-OL ACETYLTRANSFERASE); acetyl CoA:(Z)-3-hexen-1-ol acetyltransferase                | 1.48 | 1.638 | 5.723   |
| AT3G05580 | serine/threonine protein phosphatase, putative                                                                     | nde  | 1.712 | 5.560   |
| AT3G06490 | MYB108 (BOTRYTIS-SUSCEPTIBLE1. myb domain protein 108); DNA binding / transcription factor                         | nde  | 1.451 | 5.775   |
| AT3G09830 | protein kinase, putative                                                                                           | nde  | 1.640 | 9.284   |
| AT3G16720 | ATL2 (Arabidopsis T?xicos en Levadura 2); protein binding / zinc ion binding                                       | nde  | 1.565 | 8.794   |
| AT3G17110 | pseudogene                                                                                                         | 0.68 | 2.161 | 6.778   |
| AT3G17860 | unknown protein                                                                                                    | nde  | 1.639 | 5.373   |
| AT3G21070 | NADK1 (NAD kinase 1); NAD+ kinase                                                                                  | 1.46 | 4.529 | 7.089   |
| AT3G23220 | DNA binding / transcription factor                                                                                 | nde  | 4.410 | 6.636   |
| AT3G26980 | ubiquitin family protein                                                                                           | nde  | 2.026 | 5.331   |
| AT3G44260 | CCR4-NOT transcription complex protein. putative                                                                   | nde  | 2.549 | 9.032   |
| AT3G45640 | ATMPK3 (MITOGEN-ACTIVATED PROTEIN KINASE 3); MAP kinase/ kinase/ protein kinase                                    | nde  | 1.474 | 5.175   |
| AT3G46620 | zinc finger (C3HC4-type RING finger) family protein                                                                | 1.63 | 2.551 | 7.820   |
| AT3G46930 | protein kinase family protein                                                                                      | nde  | 2.091 | 8.514   |
| AT3G47550 | zinc finger (C3HC4-type RING finger) family protein                                                                | nde  | 1.453 | 7.775   |
| AT3G50970 | LT130/XERO2 (LOW TEMPERATURE-INDUCED 30)                                                                           | 3.73 | 5.225 | 17.689  |
| AT3G53780 | rhomboid family protein                                                                                            | 1.81 | 1.877 | 8.381   |
| AT3G53790 | TRFL4 (TRF-LIKE 4); DNA binding                                                                                    | nde  | 1.498 | 101.354 |
| AT3G53960 | proton-dependent oligopeptide transport (POT) family protein                                                       | nde  | 1.701 | 5.977   |
| AT3G56260 | unknown protein                                                                                                    | 2.96 | 1.727 | 5.964   |
| AT3G57530 | CPK32 (CALCIUM-DEPENDENT PROTEIN KINASE 32); calcium- and calmodulin-dependent protein kinase/ kinase              | nde  | 2.296 | 9.631   |
| AT3G59350 | kinase                                                                                                             | nde  | 2.829 | 24.896  |
| AT4G01010 | ATCNGC13 (cyclic nucleotide gated channel 13); calmodulin binding / cyclic nucleotide binding / ion channel        | nde  | 1.699 | 7.102   |
| AT4G01250 | WRKY22 (WRKY DNA-binding protein 22); transcription factor                                                         | nde  | 2.184 | 9.249   |
| AT4G12410 | auxin-responsive family protein                                                                                    | nde  | 1.675 | 22.333  |
| AT4G23050 | protein kinase, putative                                                                                           | nde  | 1.512 | 6.793   |
| AT4G26080 | ABI1 (ABA INSENSITIVE 1); calcium ion binding / protein phosphatase type 2C                                        | nde  | 1.679 | 12.975  |
| AT4G27657 | unknown protein                                                                                                    | 2.71 | 3.199 | 5.102   |
| AT4G27940 | mitochondrial substrate carrier family protein                                                                     | 1.79 | 1.485 | 6.751   |
| AT4G27970 | C4-dicarboxylate transporter/malic acid transport family protein                                                   | nde  | 1.635 | 6.084   |
| AT4G30210 | ATR2 (ARABIDOPSIS P450 REDUCTASE 2)                                                                                | nde  | 2.379 | 5.220   |
| AT4G30350 | heat shock protein-related                                                                                         | nde  | 2.588 | 6.816   |
| AT4G34410 | AP2 domain-containing transcription factor. putative                                                               | nde  | 5.418 | 96.811  |
| AT4G36500 | unknown protein                                                                                                    | 1.47 | 3.104 | 21.796  |
| AT4G39640 | GGT1; gamma-glutamyltransferase                                                                                    | nde  | 3.467 | 5.066   |
| AT4G39980 | DHS1 (3-DEOXY-D-ARABINO-HEPTULOSONATE 7-PHOSPHATE SYNTHASE 1); 3-deoxy-7-phosphoheptulonate synthase               | nde  | 1.780 | 5.761   |
| AT5G09440 | phosphate-responsive protein, putative                                                                             | 2.36 | 2.675 | 5.522   |
| AT5G16970 | AT-AER (ALKENAL REDUCTASE); 2-alkenal reductase                                                                    | nde  | 2.783 | 11.142  |
| AT5G24590 | TIP (TCV-INTERACTING PROTEIN); transcription factor                                                                | nde  | 1.564 | 12.375  |
| AT5G26030 | ferrochelatase                                                                                                     | 1.69 | 3.925 | 8.635   |
| AT5G42650 | AOS (ALLENE OXIDE SYNTHASE); hydro-lyase/ oxygen binding                                                           | 0.47 | 1.692 | 11.540  |
| AT5G43380 | TOPP6 (Type one serine/threonine protein phosphatase 6); protein phosphatase type 1                                | nde  | 1.498 | 5.064   |
| AT5G44070 | CAD1 (CADMIUM SENSITIVE 1)                                                                                         | nde  | 1.985 | 7.179   |
| AT5G47230 | ERF5 (ETHYLENE RESPONSIVE ELEMENT BINDING FACTOR 5); DNA binding / transcription factor/ transcriptional activator | nde  | 3.014 | 8.845   |
| AT5G47240 | ATNUDT8 (Arabidopsis thaliana Nudix hydrolase homolog 8); hydrolase                                                | nde  | 1.777 | 55.025  |
| AT5G53750 | unknown protein                                                                                                    | 2    | 5.049 | 17.198  |
| AT5G53760 | MLO11 (MILDEW RESISTANCE LOCUS O 11); calmodulin binding                                                           | nde  | 1.953 | 6.557   |

|           |                                                                     |     |       |        |
|-----------|---------------------------------------------------------------------|-----|-------|--------|
| AT5G55120 | unknown protein                                                     | nde | 1.446 | 5.380  |
| AT5G56980 | unknown protein                                                     | nde | 1.627 | 24.030 |
| AT5G57630 | CIPK21 (CBL-INTERACTING PROTEIN KINASE 21); kinase                  | nde | 1.611 | 13.027 |
| AT5G58430 | AEXO70B1 (exocyst subunit EXO70 family protein B1); protein binding | nde | 1.436 | 8.095  |
| AT5G62620 | galactosyltransferase family protein                                | nde | 1.560 | 5.517  |
| AT5G64310 | AGP1 (ARABINOGALACTAN-PROTEIN 1)                                    | nde | 3.250 | 6.882  |
| AT5G67210 | nucleic acid binding / pancreatic ribonuclease                      | nde | 1.563 | 24.511 |

---

nde: not differentially expressed, genes with a Bonferroni *P*-values higher than 5% were considered as being not differentially expressed as described in Lurin *et al.*(2004).

**Supplemental Table 2.** List of  $^1\text{O}_2$  specific genes induced in *ch1* mutant leaves during acclimation (A= 450  $\mu\text{mol photons m}^{-2} \text{s}^{-1}$ , 2 d).

| Locus identifier | Description                                                   | Fold change    |            |
|------------------|---------------------------------------------------------------|----------------|------------|
|                  |                                                               | <i>ch1</i> A/C | <i>flu</i> |
| AT1G69500        | oxygen binding                                                | 1.947          | 9.382      |
| AT2G25625        | unknown protein                                               | 1.632          | 5.366      |
| AT3G56260        | unknown protein                                               | 1.733          | 5.964      |
| AT4G27657        | unknown protein                                               | 2.153          | 5.102      |
| AT4G30210        | ATR2 (ARABIDOPSIS P450 REDUCTASE 2)                           | 1.757          | 5.220      |
| AT4G39980        | DHS1 (3-DEOXY-D-ARABINO-HEPTULOSONATE 7-PHOSPHATE SYNTHASE 1) | 1.709          | 5.761      |
| AT5G16970        | AT-AER (ALKENAL REDUCTASE); 2-alkenal reductase               | 1.485          | 11.142     |
| AT5G53750        | unknown protein                                               | 1.594          | 17.198     |

**Supplemental Table 3.** Changes in the expression of genes involved in the jasmonate pathway in WT and *chl* leaves during acclimation (A), stress (S) and acclimation followed by S (AS) as measured by microarray-based transcriptomic analyses. C= control conditions.

| Locus     | Gene description              | WT                       |       |     |      | <i>chl</i>               |       |      |      |
|-----------|-------------------------------|--------------------------|-------|-----|------|--------------------------|-------|------|------|
|           |                               | Log <sub>2</sub> (ratio) |       |     |      | Log <sub>2</sub> (ratio) |       |      |      |
|           |                               | A/C                      | S/C   | S/A | S/AS | A/C                      | S/C   | S/A  | S/AS |
| AT1G02660 | lipase class 3 family protein | nde                      | nde   | nde | nde  | nde                      | 1.55  | 1.42 | 1.10 |
| AT3G45140 | LOX2 (LIPOXYGENASE 2)         | -0.65                    | -1.17 | nde | nde  | nde                      | 1.29  | 1.43 | 1.04 |
| AT1G17420 | LOX3 (Lipoxygenase 3)         | nde                      | nde   | nde | nde  | nde                      | 2.40  | 2.49 | 2.41 |
| AT5G42650 | AOS (ALLENE OXIDE SYNTHASE)   | -0.64                    | -1.09 | nde | nde  | -0.68                    | 0.76  | 1.25 | 1.11 |
| AT3G25760 | AOC1 (ALLENE OXIDE CYCLASE 1) | nde                      | nde   | nde | nde  | -0.62                    | 2.27  | 2.54 | 2.30 |
| AT3G25770 | AOC2 (ALLENE OXIDE CYCLASE 2) | nde                      | nde   | nde | nde  | -0.69                    | 1.25  | 1.55 | 1.43 |
| AT3G25780 | AOC3 (ALLENE OXIDE CYCLASE 3) | nde                      | nde   | nde | nde  | nde                      | 1.71  | 1.82 | 1.77 |
| AT1G13280 | AOC4 (ALLENE OXIDE CYCLASE 4) | nde                      | -0.68 | nde | nde  | nde                      | -0.82 | nde  | nde  |
| AT2G06050 | OPR3 (OPDA-REDUCTASE 3)       | nde                      | nde   | nde | nde  | nde                      | 2.43  | 2.77 | 2.60 |

**Supplemental Table 4.** Functional categories significantly enriched in genes induced or repressed in *ch1* leaves during acclimation to high light stress (A) in comparison with their relative abundance in the genome.

| Functional category                          | Subcategory                                                                                          | <i>Ch1</i> A/C Matches % | Genome Matches % | <i>p</i> -value |
|----------------------------------------------|------------------------------------------------------------------------------------------------------|--------------------------|------------------|-----------------|
| <b>Repression</b>                            |                                                                                                      |                          |                  |                 |
| 42 BIOGENESIS OF CELLULAR COMPONENTS         | 42.01 cell wall                                                                                      | 12.1%                    | 0.92%            | 2.38e-04        |
| 70 SUBCELLULAR LOCALIZATION                  | 70.01 cell wall                                                                                      | 12.1%                    | 1.51%            | 1.51e-03        |
| <b>Induction</b>                             |                                                                                                      |                          |                  |                 |
| 01 METABOLISM                                |                                                                                                      | 35.3%                    | 17.3%            | 3.72e-04        |
|                                              | 01.01 amino acid metabolism                                                                          | 7.69%                    | 1.2%             | 1.12e-03        |
|                                              | 01.01.09 metabolism of the cysteine - aromatic group                                                 | 6.15%                    | 0.47%            | 2.71e-04        |
|                                              | 01.01.09.04 metabolism of phenylalanine                                                              | 6.15%                    | 0.11%            | 9.71e-07        |
|                                              | 01.01.09.05 metabolism of tyrosine                                                                   | 3.07%                    | 0.09%            | 1.74e-03        |
|                                              | 01.06.06.11 tetracyclic and pentacyclic triterpenes (cholesterin, steroids and hopanoids) metabolism | 3.07%                    | 0.15%            | 4.58e-03        |
|                                              | 01.07 metabolism of vitamins, cofactors, and prosthetic groups                                       | 6.15%                    | 0.88%            | 2.64e-03        |
|                                              | 01.07.01 biosynthesis of vitamins, cofactors, and prosthetic groups                                  | 4.61%                    | 0.44%            | 3.11e-03        |
|                                              | 01.20 secondary metabolism                                                                           | 16.9%                    | 1.49%            | 3.28e-09        |
|                                              | 01.20.35 metabolism of secondary products derived from L-phenylalanine and L-tyrosine                | 13.8%                    | 0.45%            | 1.59e-11        |
|                                              | 01.20.35.01 metabolism of phenylpropanoids                                                           | 13.8%                    | 0.41%            | 6.56e-12        |
|                                              | 01.20.35.01.05 metabolism of stilbenes, flavonoids                                                   | 9.23%                    | 0.16%            | 9.86e-10        |
| 16 PROTEIN WITH BINDING FUNCTION             | 16.03.01 DNA binding                                                                                 | 13.8%                    | 4.90%            | 4.31e-03        |
| 32 CELL RESCUE, DEFENSE AND VIRULENCE        |                                                                                                      | 26.1%                    | 5.01%            | 1.38e-08        |
|                                              | 32.01 stress response                                                                                | 23.0%                    | 2.92%            | 4.68e-10        |
|                                              | 32.01.01 oxidative stress response                                                                   | 7.69%                    | 0.70%            | 9.64e-05        |
|                                              | 32.01.06 cold shock response                                                                         | 6.15%                    | 0.58%            | 5.63e-04        |
|                                              | 32.01.13 electromagnetic waves stress response (e.g. UV, X-ray)                                      | 3.07%                    | 0.10%            | 2.01e-03        |
| 34 INTERACTION WITH THE ENVIRONMENT          |                                                                                                      | 23.0%                    | 5.81%            | 3.59e-06        |
|                                              | 34.11 cellular sensing and response to external stimulus                                             | 23.0%                    | 5.24%            | 1.00e-06        |
|                                              | 34.11.01 photoperception and response                                                                | 7.69%                    | 0.93%            | 3.56e-04        |
|                                              | 34.11.03 chemoperception and response                                                                | 12.3%                    | 2.95%            | 6.48e-04        |
|                                              | 34.11.09 temperature perception and response                                                         | 6.15%                    | 0.92%            | 3.12e-03        |
| 36 SYSTEMIC INTERACTION WITH THE ENVIRONMENT |                                                                                                      | 15.3%                    | 2.66%            | 8.10e-06        |
|                                              | 36.20 plant / fungal specific systemic sensing and response                                          | 12.3%                    | 2.43%            | 1.77e-04        |
|                                              | 36.20.18 plant hormonal regulation                                                                   | 12.3%                    | 2.07%            | 5.81e-05        |
|                                              | 36.20.18.02 ethylen response                                                                         | 7.69%                    | 0.35%            | 3.41e-06        |
|                                              | 36.25 animal specific systemic sensing and response                                                  | 4.61%                    | 0.37%            | 1.91e-03        |
|                                              | 36.25.16 immune response                                                                             | 4.61%                    | 0.35%            | 1.58e-03        |
|                                              | 36.25.16.08 response to wounding                                                                     | 4.61%                    | 0.28%            | 8.28e-04        |



**Supplemental Table 5.** Gene specific primers and oligonucleotide sequences used for the qRT-PCR analyses.

| Name                       | Locus     | Primer sequence 5'-3'   | Primer sequence 3'-5'       | Length (pb) |
|----------------------------|-----------|-------------------------|-----------------------------|-------------|
| Lipase class 3             | At1g02660 | GAGAAGAACAAAAGTCGCAAGAT | ACGAGAGTGAAGGTAAGAAGCAG     | 81          |
| MAPKKK18                   | At1g05100 | TAAAATCCGCCGAGTTTCAC    | ATCCGATGACGTACGGAGAG        | 87          |
| AOC4                       | At1g13280 | AGGTCTCTCCACACGAGCA     | TCGTAGACGTTAAGCTCTTGGAT     | 123         |
| LOX3                       | At1g17420 | GCTGATAAAAATTGGTCGAAACA | TCTTCGGCAACTTCGTTTTT        | 76          |
| Disease resistance protein | At1g57630 | GCGTTGTTCAACCATGAAAAT   | TAGTGATGACCACCGGAAG         | 70          |
| OPR3                       | At2g06050 | GGAAAACAGGTGGCGAGTT     | CATTCAAAGCAGAAAGGCAAT       | 122         |
| PRF1                       | At2g19760 | AGAGCGCCAAATTCCTCAG     | CCTCCAGGTCCTTCTTCC          | 169         |
| RD20                       | At2g33380 | GTCCATTCGGATGCTCTGT     | GTACGGAACGATTTGGAGGA        | 86          |
| AOC1                       | At3g25760 | GATTCGTTCCCTTGCCATCAC   | AACCTGTCCGTAGGCACCTT        | 60          |
| AOC2                       | At3g25770 | TTCCTCGCCATCACTGGT      | GCTCCAACGGCAAATCAT          | 136         |
| AOC3                       | At3g25780 | GGAATCTCATCTAACGGTCCAG  | TCATACACGTTTAGTTCCTTGGATCTT | 149         |
| LOX2                       | At3g45140 | TGACCAGGAAGGCTTACCC     | TCCATGTTCTGCGGTCTTATC       | 73          |
| BAP1                       | At3g61190 | TAAACCGGAGACCCATCAAG    | TCGACATTTCTCGTCGATTTT       | 62          |
| Executer 1                 | At4g33630 | GCTGTCGGGTTTGACAAAAT    | TCCTTTCCACCTTCCACTG         | 147         |
| RRTF1                      | At4g34410 | CAGTTGAAGCAGAGCAATGG    | TCATCCACTCCTCCATATTGC       | 60          |
| AOS                        | At5g42650 | CAAAGACCGTTGGGATTACTTT  | CGGATTCGTGATTGAAGAAC        | 63          |
